# Supplementary material for: Evidence of raw material selection in Acheulean lithic tools of Notarchirico (MIS 15, Southern Italy)
Source: Research Square preprint supplement (doi:10.21203/rs.3.rs-6812579/v1), 2025-06-09
Supplement: Supplementary file 1 [file 175b2fff6000d41d068edecd.xlsx]

## Sheet: Foglio1
Table 1: Archaeological, dimensional and lithological characteristics of the lithic assemblage. Abbreviation key: ID = invetory number of the artifact; F max = maximum lenght (Feret diameter); L = limestone; Ch = chert; M = marl; h = homogeneous; lm = laminated; a = arenaceous; r = rudaceous; p = pelitic; mdst = mudstone; wkst = wackestone; pkst = packstone; rdst = rudstone; sil-cl = silicified c…
Archaeological type	ID	Lengh	Width	Thickness	F max	Lithology	Structure	Texture	Litotype	Fracturing
Tool	7	88	79	59	118.3	L	h	a	pkst	0
Core	8	113	103	66	152.9	L	h	a	pkst	1
Tool	9	120	77	46	137.2	Ch	h	a	sil-ca	1
Tool	9	118	70	50	142.6	L	h	a	pkst	1
Tool	1333	135	113	53	176.1	L	h	p	mdst	0
Tool	1590	87	72	54	112.9	Ch	h	a	sil-ca	2
Tool	1640	91	90	72	128	L	h	a	wkst	1
Tool	1646	84	72	33	110.6	M	h	p	marl	1
Flake	1697	83	57	47	100.7	L	h	r	rdst	3
Tool	1825	98	85	66	129.7	L	h	a	pkst	2
Tool	1861	77	63	39	99.5	Ch	lm	a	sil-ca	1
Tool	1876	117	104	53	156.5	L	h	a	pkst	1
Tool	1939	77	52	43	92.9	L	h	a	pkst	1
Nodule	1951	51	27	14	57.7	Ch	h	p	sil-cl	0
Tool	1957	97	54	37	110.7	L	h	p	mdst	2
Tool	1988	113	89	47	143.6	L	h	a	wkst	0
Core	1996	77	82	58	112.6	L	h	a	pkst	0
Tool	1997	107	75	38	130.8	Ch	h	a	sil-ca	1
Tool	2076	146	141	60	203	L	h	a	wkst	1
Tool	2077	94	93	63	132.1	L	h	a	wkst	1
Tool	2161	91	77	55	107.4	M	lm	a	marl	2
Tool	2167	107	88	51	138.4	L	h	a	pkst	1
Flake	2177	82	105	58	133.3	L	h	a	wkst	2
Tool	2195	78	61	25	99	L	h	a	wkst	2
Tool	2200	126	87	57	153	L	h	a	wkst	1
Core	2315	54	51	40	74.2	Ch	h	a	sil-ca	1
Flake	2426	93	64	36	112.7	L	h	a	pkst	2
Tool	2521	43	44	21	61.3	Ch	h	a	sil-ca	0
Tool	3064	141	82	67	162.7	L	h	a	pkst	0
Tool	3187	115	73	45	136.5	L	h	a	wkst	1
Tool	3486	92	103	53	138.2	Ch	h	p	sil-cl	1
Tool	3551	65	50	28	82	Ch	h	a	sil-ca	1
Tool	3951	117	84	41	144.2	Ch	h	p	sil-cl	1
Flake	4122	85	94	30	126.5	L	h	a	pkst	2
Tool	4352	69	60	25	91.2	L	h	a	wkst	1
Tool	4485	120	90	40	150	L	h	a	pkst	1
Tool	4567	63	46	29	78	M	h	p	marl	1
Tool	4578	116	92	47	148	L	h	a	pkst	0
Tool	4649	115	78	55	139	L	h	a	wkst	2
Core	4890	95	81	63	124.7	L	h	a	wkst	1
Tool	6020	92	63	27	111.5	L	h	a	pkst	3
Tool	6021	91.8	63.3	26.7	116.6	L	h	a	pkst	1
Tool	6023	88.4	76.3	23.3	93.5289	L	h	a	pkst	0
Tool	6024	69.4	62.7	23.9	122.041	L	h	a	pkst	2
Tool	6025	100.8	68.8	39.2	108.285	L	lm	a	pkst	1
Tool	6026	88	63.1	27.6	124.281	L	lm	a	pkst	1
Flake	6027	94	81.3	32	141.4	L	h	a	pkst	3
Flake	6028	114.7	82.9	44.4	65.7218	Ch	h	a	sil-ca	1
Flake	6029	102.3	77.5	50.3	128.341	L	h	a	pkst	2
Flake	6030	53.7	123.4	28.8	134.578	L	h	a	pkst	1
Tool	6034	107.6	68.5	31.8	127.5	L	lm	a	pkst	2
Tool	6130	67	50	31	83	L	h	a	pkst	2
Tool	6162	90	91	39	127.8	L	h	r	rdst	0
Tool	6170	119	85	55	146.4	Ch	lm	a	sil-ca	0
Tool	6183	111	77	48	135.1	L	h	r	rdst	3
Tool	6273	129	76	37	149.6	L	h	a	pkst	1
Core	6343	96	71	54	119.5	L	h	a	wkst	2
Tool	6779	78	58	31	97.1	Ch	lm	p	sil-cl	1
Tool	6806	85	65	59	107.1	L	lm	a	pkst	0
Tool	6925	97	86	56	129.6	L	h	a	wkst	2
Tool	6941	86	80	57	117.5	L	h	a	wkst	1
Flake	7078	68	60	30	90.5	L	h	p	mdst	0
Tool	7201	135	93	58	163.9	Ch	h	a	sil-ca	1
Tool	7330	71	85	69	110.7	L	h	a	wkst	2
Tool	7346	60	31	44	67.4	M	h	p	marl	2
Tool	7381	79	78	49	111.2	L	h	a	pkst	2
Tool	7404	170	95	59	194.6	M	h	p	marl	2
Tool	8218	81	70	39	107.2	L	h	a	pkst	2
Tool	8253	87	82	40	120	L	h	a	wkst	2
Tool	8332	88	76	47	116.4	L	h	a	wkst	2
Core	8334	80	71	56	106.8	L	h	p	mdst	2
Tool	8651	113	79	67	137.6	L	h	a	wkst	0
Flake	8773	138	73	69	155.9	L	h	a	pkst	2
Nodule	2017bis	26	33	11	42.2	Ch	h	a	sil-ca	0
