# Supplementary material for: Evidence of raw material selection in Acheulean lithic tools of Notarchirico (MIS 15, Southern Italy)
Source: Research Square preprint supplement (doi:10.21203/rs.3.rs-6812579/v1), 2025-06-09
Supplement: Supplementary file 2 [file 37a91bf79158bf856dc7aa79.xlsx]

## Sheet: Foglio1
Table 3: Particle parameters obtained with Fiji software (CI and ARI) and calculated after Takashimizu and Iiyoshi (2016). See text for details.
Area	Clast number	CI	ARI	CAR	R
B1	1	0.623	1.209	0.896719	0.639281
B1	2	0.697	1.137	0.904757	0.705243
B1	3	0.686	1.661	0.83165	0.76735
B1	4	0.703	1.315	0.883461	0.732539
B1	5	0.739	1.232	0.893978	0.758022
B1	6	0.793	1.459	0.863218	0.842782
B1	7	0.684	1.194	0.898462	0.698538
B1	8	0.658	1.272	0.889028	0.681972
B1	9	0.739	1.487	0.859035	0.792965
B1	10	0.668	1.504	0.856461	0.724539
B1	11	0.671	1.746	0.8176	0.7664
B1	12	0.711	1.304	0.884908	0.739092
B1	13	0.802	1.18	0.900058	0.814942
B1	14	0.762	1.473	0.861136	0.813864
B1	15	0.663	1.179	0.900171	0.675829
B1	16	0.706	1.419	0.869066	0.749934
B1	17	0.686	1.773	0.81307	0.78593
B1	18	0.787	1.143	0.90412	0.79588
B1	19	0.645	1.25	0.891779	0.666221
B1	20	0.642	2.132	0.75132	0.80368
B1	21	0.692	1.497	0.857524	0.747476
B1	22	0.748	1.2	0.897769	0.763231
B1	23	0.721	1.797	0.80902	0.82498
B1	24	0.698	1.802	0.808174	0.802826
B1	25	0.708	1.517	0.854475	0.766525
B1	26	0.771	1.156	0.902719	0.781281
B1	27	0.719	1.222	0.895179	0.736821
B1	28	0.551	2.52	0.685646	0.778354
B1	29	0.767	1.633	0.836195	0.843805
B1	30	0.558	1.664	0.83116	0.63984
B1	31	0.831	1.328	0.881732	0.862268
B1	32	0.827	1.142	0.904227	0.835773
B1	33	0.826	1.223	0.89506	0.84394
B1	34	0.528	1.512	0.855241	0.585759
B1	35	0.72	1.309	0.884253	0.748747
B1	36	0.669	1.275	0.888647	0.693353
B1	37	0.592	1.366	0.876557	0.628443
B1	38	0.681	1.677	0.829033	0.764967
B1	39	0.632	2.007	0.772973	0.772027
B1	40	0.587	1.417	0.869354	0.630646
B1	41	0.719	1.084	0.910107	0.721893
B1	42	0.503	2.056	0.764483	0.651517
B1	43	0.673	1.222	0.895179	0.690821
B1	44	0.513	2.46	0.695529	0.730471
B1	45	0.788	1.28	0.888011	0.812989
B1	46	0.597	1.02	0.915857	0.594143
B1	47	0.579	1.128	0.905701	0.586299
B1	48	0.777	1.32	0.882799	0.807201
B1	49	0.771	1.18	0.900058	0.783942
B1	50	0.786	1.233	0.893857	0.805143
B1	51	0.663	1.796	0.809189	0.766811
B1	52	0.607	1.822	0.804781	0.715219
B1	53	0.682	1.049	0.913352	0.681648
B1	54	0.643	1.418	0.86921	0.68679
B1	55	0.768	1.531	0.852322	0.828678
B1	56	0.806	1.53	0.852476	0.866524
B1	57	0.652	1.307	0.884515	0.680485
B1	58	0.758	1.181	0.899945	0.771055
B1	59	0.757	1.5	0.857068	0.812932
B1	60	0.713	1.262	0.890287	0.735713
B1	61	0.71	2.055	0.764656	0.858344
B1	62	0.665	1.927	0.786798	0.791202
B1	63	0.727	1.711	0.823427	0.816573
B1	64	0.758	1.336	0.880657	0.790343
B1	65	0.771	1.277	0.888393	0.795607
B1	66	0.798	1.356	0.877935	0.833065
B1	67	0.787	1.254	0.891284	0.808716
B1	68	0.735	1.627	0.837163	0.810837
B1	69	0.672	1.385	0.873907	0.711093
B1	70	0.79	1.142	0.904227	0.798773
B1	71	0.569	2.044	0.766563	0.715437
B1	72	0.671	1.637	0.835549	0.748451
B1	73	0.754	1.101	0.908447	0.758553
B1	74	0.816	1.385	0.873907	0.855093
B1	75	0.771	1.289	0.886856	0.797144
B1	76	0.696	1.257	0.890911	0.718089
B1	77	0.726	1.514	0.854935	0.784065
B1	78	0.669	2.172	0.744407	0.837593
B1	79	0.559	2.01	0.772453	0.699547
B1	80	0.647	1.735	0.819437	0.740563
B1	81	0.732	1.386	0.873766	0.771234
B1	82	0.63	2.271	0.727393	0.815607
B1	83	0.736	1.303	0.885039	0.763961
B1	84	0.805	1.22	0.895418	0.822582
B1	85	0.725	1.234	0.893736	0.744264
B1	86	0.725	1.408	0.870645	0.767355
B1	87	0.784	1.153	0.903045	0.793955
B1	88	0.746	1.479	0.860237	0.798763
B1	89	0.74	1.022	0.91569	0.73731
B1	90	0.73	1.21	0.896601	0.746399
B1	91	0.758	1.402	0.871502	0.799498
B1	92	0.551	2.311	0.720571	0.743429
B1	93	0.778	1.558	0.848125	0.842875
B1	94	0.674	1.28	0.888011	0.698989
B1	95	0.553	1.638	0.835387	0.630613
B1	96	0.579	1.247	0.892148	0.599852
B1	97	0.673	1.459	0.863218	0.722782
B1	98	0.752	1.249	0.891902	0.773098
B1	99	0.788	1.076	0.910869	0.790131
B1	100	0.679	1.477	0.860537	0.731463
B1	101	0.779	1.574	0.845613	0.846387
B1	102	0.814	1.327	0.881865	0.845135
B1	103	0.672	1.464	0.862477	0.722523
B1	104	0.792	1.051	0.913173	0.791827
B1	105	0.704	1.24	0.893006	0.723994
B1	106	0.699	1.442	0.865723	0.746277
B1	107	0.519	1.771	0.813406	0.618594
B1	108	0.722	1.503	0.856613	0.778387
B1	109	0.703	1.18	0.900058	0.715942
B1	110	0.674	1.389	0.873344	0.713656
B1	111	0.52	1.195	0.898347	0.534653
B2	1	0.658	1.644	0.834415	0.736585
B2	2	0.818	1.127	0.905805	0.825195
B2	3	0.757	1.396	0.872354	0.797646
B2	4	0.552	1.76	0.815255	0.649745
B2	5	0.64	1.296	0.885951	0.667049
B2	6	0.738	1.543	0.850464	0.800536
B2	7	0.659	1.498	0.857372	0.714628
B2	8	0.557	1.247	0.892148	0.577852
B2	9	0.656	1.584	0.844033	0.724967
B2	10	0.655	1.665	0.830997	0.737003
B2	11	0.556	1.084	0.910107	0.558893
B2	12	0.607	1.726	0.820937	0.699063
B2	13	0.592	1.925	0.787142	0.717858
B2	14	0.614	1.466	0.862179	0.664821
B2	15	0.768	1.149	0.903477	0.777523
B2	16	0.653	1.139	0.904546	0.661454
B2	17	0.75	1.174	0.900732	0.762268
B2	18	0.53	1.175	0.90062	0.54238
B2	19	0.73	1.147	0.903692	0.739308
B2	20	0.707	1.144	0.904014	0.715986
B2	21	0.683	1.931	0.786108	0.809892
B2	22	0.738	1.458	0.863366	0.787634
B2	23	0.647	1.516	0.854629	0.705371
B2	24	0.707	1.598	0.84181	0.77819
B2	25	0.51	1.088	0.909721	0.513279
B2	26	0.739	1.351	0.87862	0.77338
B2	27	0.62	1.375	0.875307	0.657693
B2	28	0.538	1.808	0.807157	0.643843
B2	29	0.792	1.186	0.899378	0.805622
B2	30	0.777	1.152	0.903153	0.786847
B2	31	0.607	1.351	0.87862	0.64138
B2	32	0.615	1.391	0.873061	0.654939
B2	33	0.577	1.989	0.776089	0.713911
B2	34	0.774	1.105	0.908048	0.778952
B2	35	0.713	1.247	0.892148	0.733852
B2	36	0.662	1.123	0.90622	0.66878
B2	37	0.564	1.5	0.857068	0.619932
B2	38	0.631	1.207	0.896953	0.647047
B2	39	0.794	1.066	0.911806	0.795194
B2	40	0.553	1.971	0.779202	0.686798
B2	41	0.778	1.445	0.865283	0.825717
B2	42	0.71	1.193	0.898577	0.724423
B2	43	0.782	1.402	0.871502	0.823498
B2	44	0.726	1.468	0.861881	0.777119
B2	45	0.749	1.58	0.844666	0.817334
B2	46	0.674	1.137	0.904757	0.682243
B2	47	0.722	1.381	0.874468	0.760532
B2	48	0.503	1.682	0.828212	0.587788
B2	49	0.603	1.341	0.879981	0.636019
B2	50	0.604	1.255	0.891159	0.625841
B2	51	0.701	1.053	0.912993	0.701007
B2	52	0.797	1.528	0.852785	0.857215
B2	53	0.731	1.473	0.861136	0.782864
B2	54	0.587	1.147	0.903692	0.596308
B2	55	0.509	1.657	0.832302	0.589698
B2	56	0.627	1.138	0.904652	0.635348
B2	57	0.746	1.283	0.887627	0.771373
B2	58	0.802	1.219	0.895537	0.819463
B2	59	0.593	2.095	0.757725	0.748275
B2	60	0.776	1.452	0.864253	0.824747
B2	61	0.691	1.163	0.901953	0.702047
B2	62	0.641	1.237	0.893372	0.660628
B2	63	0.743	1.343	0.87971	0.77629
B2	64	0.717	1.13	0.905493	0.724507
B2	65	0.598	1.548	0.849686	0.661314
B2	66	0.514	2.227	0.734935	0.692065
B2	67	0.729	1.156	0.902719	0.739281
B2	68	0.744	1.229	0.89434	0.76266
B2	69	0.506	1.503	0.856613	0.562387
B2	70	0.627	1.888	0.793505	0.746495
B2	71	0.797	1.228	0.89446	0.81554
B2	72	0.515	2.107	0.755647	0.672353
B2	73	0.664	1.322	0.882533	0.694467
B2	74	0.676	1.875	0.795734	0.793266
B2	75	0.672	1.24	0.893006	0.691994
B2	76	0.591	1.435	0.866746	0.637254
B2	77	0.515	1.421	0.868777	0.559223
B2	78	0.618	1.34	0.880116	0.650884
B2	79	0.625	1.685	0.827719	0.710281
B2	80	0.635	1.204	0.897304	0.650696
B2	81	0.681	1.303	0.885039	0.708961
B2	82	0.595	1.37	0.876002	0.631998
B2	83	0.604	1.385	0.873907	0.643093
B2	84	0.707	1.338	0.880387	0.739613
B2	85	0.519	1.37	0.876002	0.555998
B2	86	0.614	1.233	0.893857	0.633143
B2	87	0.531	1.201	0.897653	0.546347
B2	88	0.522	1.295	0.886081	0.548919
B2	89	0.574	1.171	0.901067	0.585933
B2	90	0.552	1.156	0.902719	0.562281
B2	91	0.62	1.443	0.865576	0.667424
B2	92	0.508	1.842	0.801376	0.619624
B2	93	0.582	1.369	0.876141	0.618859
B2	94	0.604	1.526	0.853093	0.663907
B2	95	0.587	1.413	0.869929	0.630071
B2	96	0.542	1.797	0.80902	0.64598
B2	97	0.522	1.547	0.849842	0.585158
B2	98	0.64	1.183	0.899719	0.653281
B2	99	0.694	1.265	0.88991	0.71709
B2	100	0.634	1.239	0.893128	0.653872
B2	101	0.622	1.859	0.798473	0.736527
B2	102	0.595	1.464	0.862477	0.645523
B2	103	0.632	1.307	0.884515	0.660485
B2	104	0.75	1.494	0.857978	0.805022
B2	105	0.517	1.32	0.882799	0.547201
B2	106	0.737	1.178	0.900283	0.749717
B2	107	0.594	1.329	0.881598	0.625402
B2	108	0.657	1.406	0.870931	0.699069
B2	109	0.58	1.486	0.859185	0.633815
B2	110	0.589	1.243	0.89264	0.60936
B2	111	0.692	1.049	0.913352	0.691648
B2	112	0.704	1.191	0.898807	0.718193
B2	113	0.645	1.485	0.859336	0.698664
B2	114	0.569	1.379	0.874748	0.607252
B2	115	0.56	1.295	0.886081	0.586919
B3	1	0.696	1.313	0.883726	0.725274
B3	2	0.785	1.167	0.901511	0.796489
B3	3	0.734	1.216	0.895893	0.751107
B3	4	0.77	1.485	0.859336	0.823664
B3	5	0.691	1.374	0.875446	0.728554
B3	6	0.667	1.565	0.847028	0.732972
B3	7	0.734	1.68	0.82854	0.81846
B3	8	0.687	1.257	0.890911	0.709089
B3	9	0.791	1.342	0.879845	0.824155
B3	10	0.777	1.115	0.907039	0.782961
B3	11	0.641	1.669	0.830343	0.723657
B3	12	0.814	1.106	0.907948	0.819052
B3	13	0.753	1.294	0.88621	0.77979
B3	14	0.669	1.536	0.851549	0.730451
B3	15	0.716	1.354	0.87821	0.75079
B3	16	0.798	1.302	0.88517	0.82583
B3	17	0.676	1.316	0.883329	0.705671
B3	18	0.714	1.357	0.877798	0.749202
B3	19	0.819	1.06	0.912358	0.819642
B3	20	0.81	1.114	0.907141	0.815859
B3	21	0.676	1.489	0.858733	0.730267
B3	22	0.719	1.474	0.860986	0.771014
B3	23	0.715	1.01	0.916681	0.711319
B3	24	0.553	1.946	0.783521	0.682479
B3	25	0.652	1.643	0.834577	0.730423
B3	26	0.753	1.206	0.89707	0.76893
B3	27	0.762	1.363	0.876972	0.798028
B3	28	0.699	1.323	0.882399	0.729601
B3	29	0.551	1.735	0.819437	0.644563
B3	30	0.74	1.685	0.827719	0.825281
B3	31	0.684	1.511	0.855393	0.741607
B3	32	0.708	1.472	0.861285	0.759715
B3	33	0.629	1.635	0.835872	0.706128
B3	34	0.782	1.346	0.879302	0.815698
B3	35	0.747	1.325	0.882133	0.777867
B3	36	0.622	1.717	0.822432	0.712568
B3	37	0.775	1.196	0.898232	0.789768
B3	38	0.606	2.2	0.73958	0.77942
B3	39	0.556	2.065	0.762923	0.706077
B3	40	0.705	1.977	0.778165	0.839835
B3	41	0.828	1.123	0.90622	0.83478
B3	42	0.602	1.42	0.868921	0.646079
B3	43	0.659	1.793	0.809696	0.762304
B3	44	0.706	1.513	0.855088	0.763912
B3	45	0.539	1.537	0.851394	0.600606
B3	46	0.726	1.27	0.889281	0.749719
B3	47	0.741	1.04	0.914148	0.739852
B3	48	0.758	1.148	0.903585	0.767415
B3	49	0.769	1.511	0.855393	0.826607
B3	50	0.708	1.413	0.869929	0.751071
B3	51	0.716	1.644	0.834415	0.794585
B3	52	0.784	1.152	0.903153	0.793847
B3	53	0.703	1.672	0.829852	0.786148
B3	54	0.689	1.237	0.893372	0.708628
B3	55	0.778	1.155	0.902828	0.788172
B3	56	0.606	2.075	0.761191	0.757809
B3	57	0.791	1.27	0.889281	0.814719
B3	58	0.713	1.458	0.863366	0.762634
B3	59	0.764	1.41	0.870359	0.806641
B3	60	0.772	1.36	0.877385	0.807615
B3	61	0.7	1.352	0.878483	0.734517
B3	62	0.793	1.302	0.88517	0.82083
B3	63	0.743	1.31	0.884121	0.771879
B3	64	0.664	1.097	0.908842	0.668158
B3	65	0.735	1.084	0.910107	0.737893
B3	66	0.561	1.175	0.90062	0.57338
B3	67	0.811	1.326	0.881999	0.842001
B3	68	0.752	1.245	0.892394	0.772606
B3	69	0.809	1.291	0.886598	0.835402
B3	70	0.627	1.767	0.814079	0.725921
B3	71	0.663	1.361	0.877248	0.698752
B3	72	0.565	1.83	0.80342	0.67458
B3	73	0.816	1.304	0.884908	0.844092
B3	74	0.573	1.777	0.812396	0.673604
B3	75	0.807	1.151	0.903261	0.816739
B3	76	0.691	1.868	0.796933	0.807067
B3	77	0.818	1.298	0.885691	0.845309
B3	78	0.678	1.398	0.87207	0.71893
B3	79	0.738	1.297	0.885821	0.765179
B3	80	0.519	2.977	0.615462	0.816538
B3	81	0.554	1.815	0.80597	0.66103
B3	82	0.726	1.761	0.815087	0.823913
B3	83	0.675	1.813	0.806309	0.781691
B3	84	0.751	1.625	0.837485	0.826515
B3	85	0.599	1.377	0.875028	0.636972
B3	86	0.753	1.239	0.893128	0.772872
B3	87	0.746	1.309	0.884253	0.774747
B3	88	0.791	1.211	0.896483	0.807517
B3	89	0.821	1.17	0.901178	0.832822
B3	90	0.666	1.972	0.779029	0.799971
B3	91	0.775	1.334	0.880926	0.807074
B3	92	0.786	1.279	0.888138	0.810862
B3	93	0.727	1.543	0.850464	0.789536
B3	94	0.672	1.37	0.876002	0.708998
B3	95	0.784	1.451	0.8644	0.8326
B3	96	0.682	1.971	0.779202	0.815798
B3	97	0.77	1.384	0.874047	0.808953
B3	98	0.782	1.268	0.889533	0.805467
B3	99	0.718	1.942	0.784211	0.846789
B3	100	0.608	1.828	0.80376	0.71724
B3	101	0.765	1.467	0.86203	0.81597
B3	102	0.785	1.525	0.853247	0.844753
B3	103	0.679	1.346	0.879302	0.712698
B3	104	0.795	1.273	0.888901	0.819099
B3	105	0.839	1.133	0.905179	0.846821
B3	106	0.685	1.404	0.871217	0.726783
B3	107	0.701	1.098	0.908744	0.705256
B3	108	0.857	1.21	0.896601	0.873399
B3	109	0.742	1.073	0.911152	0.743848
B3	110	0.752	1.637	0.835549	0.829451
B3	111	0.752	1.399	0.871928	0.793072
B3	112	0.768	1.245	0.892394	0.788606
B3	113	0.642	1.542	0.850619	0.704381
B3	114	0.706	1.241	0.892884	0.726116
B3	115	0.771	1.4	0.871786	0.812214
