# Supplementary material for: Evidence of raw material selection in Acheulean lithic tools of Notarchirico (MIS 15, Southern Italy)
Source: Research Square preprint supplement (doi:10.21203/rs.3.rs-6812579/v1), 2025-06-09
Supplement: Supplementary file 3 [file cee37feb3d195b38d7c181df.xlsx]

## Sheet: Foglio1
Table 2 - Petrographic features of the analyzed clasts of the level B. Abbreviation key: Ch = chert; L = limestone; M = marl; Ss = sandstone; Q = crystalline quartz; h = homogeneous; b = bedded; lm = laminated; r = rudaceous; a = arenaceous; p = pelitic; sil-ca = silicified calcarenite; sil-cl = silicified calcilutite; lta = lithic arenite; ark = arkose; qza = quartz arenite; vqz = vein quartz; r…
Level	ID	D max (mm)	Lithology	Structure	Texture	Lithotype
B1	1	64	Ch	h	a	sil-ca
B1	2	70	L	h	r	rdst
B1	3	97	Ch	lm	a	sil-ca
B1	4	75	L	h	r	rdst
B1	5	110	L	h	r	rdst
B1	6	172	L	h	r	rdst
B1	7	28	Ch	h	a	sil-ca
B1	8	24	L	h	a	pkst
B1	9	76	L	h	r	rdst
B1	10	75	L	h	r	rdst
B1	11	27	Ch	h	a	sil-ca
B1	12	12	Ch	h	a	sil-ca
B1	13	110	L	h	r	rdst
B1	14	108	Ch	h	a	sil-ca
B1	15	130	L	h	a	pkst
B1	16	56	L	h	a	wkst
B1	17	53	Ch/L	h	a	sil-ca/pkst
B1	18	89	L	h	r	rdst
B1	19	90	L	h	a	pkst
B1	20	40	L	h	a	pkst
B1	21	110	Ch/L	h	a	sil-ca/pkst
B1	22	84	L	h	r	pkst
B1	23	49	L	h	r	rdst
B1	24	58	L	h	r	rdst
B1	25	100	L	h	a	pkst
B1	26	210	Ch	h	a	sil-ca
B1	27	87	L	h	a	pkst
B1	28	123	L	h	r	rdst
B1	29	62	L	h	r	rdst
B1	30	22	Ch	h	a	sil-ca
B1	31	84	L	h	r	rdst
B1	32	76	L	h	r	rdst
B1	33	35	Ch	h	a	sil-ca
B1	34	62	L	h	r	rdst
B1	35	80	L	h	a	pkst
B1	36	142	L	h	r	rdst
B1	37	86	Ch	lm	a	sil-ca
B1	38	62	Ch	h	a	sil-ca
B1	39	75	L	h	r	rdst
B1	40	120	Ch	lm	a	sil-ca
B1	41	45	L	h	a	pkst
B1	42	20	L	h	p	wkst
B1	43	82	Ch	h	a	sil-ca
B1	44	26	L	h	a	pkst
B1	45	63	L	h	p	wkst
B1	46	59	L	h	r	rdst
B1	47	29	Ch	h	a	sil-ca
B1	48	129	L	h	r	rdst
B1	49	69	L	h	a	pkst
B1	50	51	L	h	a	pkst
B1	51	92	Ch	h	a	sil-ca
B1	52	64	L	h	r	rdst
B1	53	142	L	h	r	rdst
B1	54	50	L	h	a	pkst
B1	55	35	Ch	lm	a	sil-ca
B1	56	84	Ch/L	h	a	sil-ca/pkst
B1	57	70	L	lm	p	mdst
B1	58	39	Ss	h	a	lta
B1	59	61	L	lm	a	pkst
B1	60	52	L	h	r	rdst
B1	61	60	Ch	h	a	sil-ca
B1	62	84	Ch/L	h	a	sil-ca/pkst
B1	63	91	Ch	h	a	sil-ca
B1	64	66	L	h	a	pkst
B1	65	125	L	h	r	rdst
B1	66	96	L	h	a	pkst
B1	67	42	L	h	a	pkst
B1	68	109	Ch	h	a	sil-ca
B1	69	81	Ch	h	a	sil-ca
B1	70	171	L	h	a	pkst
B1	71	98	Ch	h	a	sil-ca
B1	72	43	Ch	h	a	sil-ca
B1	73	44	Ch	h	a	sil-ca
B1	74	64	Ch	lm	a	sil-ca
B1	75	95	Ch	h	a	sil-ca
B1	76	152	L	h	p	wkst
B1	77	88	L	h	r	rdst
B1	78	70	L	h	r	rdst
B1	79	71	L	h	r	rdst
B1	80	92	L	h	a	pkst
B1	81	91	L	h	a	pkst
B1	82	23	Ch	h	a	sil-ca
B1	83	20	L	h	r	rdst
B1	84	63	L	h	r	rdst
B1	85	20	Ch	h	a	sil-ca
B1	86	58	L	h	a	pkst
B1	87	106	L	h	r	rdst
B1	88	37	L	h	a	pkst
B1	89	140	L	h	a	pkst
B1	90	68	L	h	a	pkst
B1	91	80	L	h	p	wkst
B1	92	68	L	h	a	pkst
B1	93	29	Ch/L	h	a	sil-ca/pkst
B1	94	23	Ch/L	h	a	sil-ca/pkst
B1	95	63	L	h	a	wkst
B1	96	40	L	h	a	pkst
B1	97	75	L	h	r	rdst
B1	98	94	Ch	h	a	sil-ca
B1	99	89	Ch	h	a	sil-ca
B1	100	70	L	h	r	rdst
B1	101	30	L	h	p	mdst
B1	102	59	M	h	p	marl
B1	103	81	Ch	h	a	sil-ca
B1	104	86	Ch	lm	a	sil-ca
B1	105	26	Ch	h	a	sil-ca
B1	106	112	L	h	p	mdst
B1	107	82	L	h	p	wkst
B1	108	138	L	h	p	wkst
B1	109	19	Ch	h	a	sil-ca
B1	110	16	L	h	a	pkst
B1	111	134	L	h	r	rdst
B1	112	113	L	h	r	rdst
B1	113	18	Ch	lm	a	sil-ca
B1	114	63	L	h	r	rdst
B1	115	55	Ch	lm	a	sil-ca
B1	116	102	L	h	r	rdst
B1	117	115	L	h	r	rdst
B1	118	68	Ch/L	h	a	sil-ca/pkst
B1	119	20	L	h	r	rdst
B1	120	79	L	b	a	pkst
B1	121	47	L	h	a	pkst
B1	122	112	L	h	a	pkst
B1	123	97	L	h	a	pkst
B1	124	92	Ch/L	h	a	sil-ca/pkst
B1	125	68	L	h	r	rdst
B1	126	18	Ch	lm	a	sil-ca
B1	127	47	Ss	h	a	qza
B1	128	112	L	h	a	pkst
B1	129	31	L	h	a	pkst
B1	130	63	L	h	r	rdst
B1	131	139	L	h	r	rdst
B1	132	72	L	h	r	rdst
B1	133	108	L	h	r	rdst
B1	134	50	L	h	p	wkst
B1	135	84	Ch	h	a	sil-ca
B1	136	70	L	h	a	pkst
B1	137	100	Ch/L	h	a	sil-ca/pkst
B1	138	42	Ch	h	a	sil-ca
B1	139	65	Ch	h	a	sil-ca
B1	140	82	Ch	h	a	sil-ca
B1	141	146	L	h	r	rdst
B1	142	126	L	h	r	rdst
B1	143	75	L	h	a	pkst
B1	144	85	L	h	r	rdst
B1	145	74	L	h	a	pkst
B1	146	40	L	h	a	pkst
B1	147	82	L	h	r	rdst
B1	148	20	Ch	h	p	sil-cl
B1	149	51	Ch/L	h	a	sil-ca/pkst
B1	150	61	L	h	r	rdst
B1	151	104	L	h	r	rdst
B1	152	120	L	h	r	rdst
B1	153	102	L	h	a	pkst
B1	154	23	Ch	h	a	sil-ca
B1	155	40	L	h	a	pkst
B1	156	80	L	h	r	rdst
B1	157	80	Ss	h	a	ark?
B1	158	17	Ch	h	a	sil-ca
B1	159	112	L	h	r	rdst
B1	160	91	L	h	r	rdst
B1	161	150	Ch	h	a	sil-ca
B1	162	75	L	h	r	rdst
B1	163	110	L	h	r	rdst
B1	164	88	L	h	r	rdst
B1	165	112	L	h	a	pkst
B1	166	90	Ch	h	a	sil-ca
B1	167	60	L	h	r	rdst
B1	168	110	L	h	r	rdst
B1	169	61	L	h	r	rdst
B1	170	55	L	h	r	rdst
B1	171	90	L	h	r	rdst
B1	172	89	L	h	r	rdst
B1	173	41	L	h	a	pkst
B1	174	72	Ch/L	h	a	sil-ca/pkst
B1	175	49	L	h	r	rdst
B2	1	46	Ch	lm	a	sil-ca
B2	2	60	L	h	p	wkst
B2	3	54	Ch	h	p	sil-cl
B2	4	47	Ch	lm	a	sil-ca
B2	5	67	L	h	a	pkst
B2	6	70	L	h	a	pkst
B2	7	131	L	h	p	wkst
B2	8	65	Ch	lm	a	sil-ca
B2	9	50	L	h	a	pkst
B2	10	90	M	h	a	marl
B2	11	113	L	h	a	pkst
B2	12	110	L	h	a	pkst
B2	13	49	Ch	lm	a	sil-ca
B2	14	120	L	h	a	pkst
B2	15	86	Ch	lm	a	sil-ca
B2	16	93	Ch	h	a	sil-ca
B2	17	59	Ch	lm	a	sil-ca
B2	18	75	Ch	h	a	sil-ca
B2	19	60	L	h	p	mdst
B2	20	86	Ss	h	a	lta
B2	21	47	L	h	a	pkst
B2	22	17	Ch	h	a	sil-ca
B2	23	56	L	h	p	mdst
B2	24	65	Ch	h	a	sil-ca
B2	25	47	L	h	a	pkst
B2	26	53	Ch	lm	a	sil-ca
B2	27	89	Ch	h	a	sil-ca
B2	28	150	Ss	h	a	ark
B2	29	80	Ch	h	a	sil-ca
B2	30	88	L	h	p	wkst
B2	31	88	Ch	h	a	sil-ca
B2	32	40	Ss	h	a	ark?
B2	33	39	Ch	lm	p	sil-cl
B2	34	110	L	h	p	wkst
B2	35	40	Ch	h	a	sil-ca
B2	36	96	L	h	a	pkst
B2	37	94	L	h	a	pkst
B2	38	95	L	h	a	pkst
B2	39	120	L	lm	p	mdst
B2	40	71	L	h	a	wkst
B2	41	79	L	h	a	pkst
B2	42	95	L	h	a	pkst
B2	43	125	L	h	a	wkst
B2	44	115	Ch	h	a	sil-ca
B2	45	70	Ch	h	p	sil-cl
B2	46	100	Ss	h	a	lta
B2	47	42	Ss	h	a	ark?
B2	48	52	L	h	a	pkst
B2	49	90	L	lm	p	wkst
B2	50	88	Ch	h	a	sil-ca
B2	51	110	Ss	h	a	lta
B2	52	64	L	h	a	pkst
B2	53	75	L	h	a	mdst
B2	54	95	L	h	p	wkst
B2	55	120	Ch	h	a	sil-ca
B2	56	92	L	h	a	wkst
B2	57	80	L	h	a	pkst
B2	58	55	L	h	a	wkst
B2	59	66	L	h	r	rdst
B2	60	104	L	h	a	wkst
B2	61	34	L	h	a	pkst
B2	62	76	L	h	a	pkst
B2	63	80	L	h	a	pkst
B2	64	115	L	h	a	wkst
B2	65	40	L	h	a	pkst
B3	1	115	L	h	a	wkst
B3	2	125	Ch	h	a	sil-ca
B3	3	120	Ch	h	a	sil-ca
B3	4	130	L	h	p	wkst
B3	5	83	L	h	p	pkst
B3	6	138	L	h	p	mdst
B3	7	71	L	h	p	wkst
B3	8	73	Ch	h	a	sil-ca
B3	9	61	Ch	h	a	sil-ca
B3	10	71	L	h	a	wkst
B3	11	85	Ch	h	a	sil-ca
B3	12	71	L	h	p	wkst
B3	13	33	Ch	h	p	sil-cl
B3	14	82	Q	h	m	vqz
B3	15	64	Ss	h	a	ark
B3	16	65	Ch	lm	a	sil-ca
B3	17	172	Ch	h	a	sil-ca
B3	18	48	L	h	p	mdst
B3	19	31	L	h	a	pkst
B3	20	108	L	h	a	pkst
B3	21	110	Ch	h	a	sil-ca
B3	22	110	L	h	a	pkst
B3	23	155	L	h	r	pkst
B3	24	58	L	h	p	wkst
B3	25	68	L	h	p	wkst
B3	26	58	Ch	h	a	sil-ca
B3	27	57	Ch	h	p	sil-cl
B3	28	20	Ch	lm	a	sil-ca
B3	29	115	L	h	r	rdst
B3	30	104	L	h	p	wkst
B3	31	92	L	h	a	pkst
B3	32	82	L	h	p	wkst
B3	33	50	L	h	p	wkst
B3	34	115	L	h	a	pkst
B3	35	70	L	h	a	pkst
B3	36	73	Ss	h	a	ark
B3	37	49	L	h	r	rdst
B3	38	85	L	h	p	mdst
B3	39	73	Ch	h	a	sil-ca
B3	40	120	L	h	a	pkst
B3	41	72	L	h	a	pkst
B3	42	120	Ch	lm	a	sil-ca
B3	43	42	L	h	a	pkst
B3	44	106	L	h	a	pkst
B3	45	110	L	h	a	pkst
B3	46	90	L	h	a	pkst
B3	47	71	L	h	p	wkst
B3	48	25	Ch	h	a	sil-ca
B3	49	59	Ss	h	a	ark?
